# Supplementary material
Source: PubMed Central journal article supplement (PMC5540312)
Supplement: NIHMS883383-supplement-supplement_1.pdf [file NIHMS883383-supplement-supplement_1.pdf]

## Supplemental Material

**Supplemental Figure S1** Assessing model performance for different specifications of the model

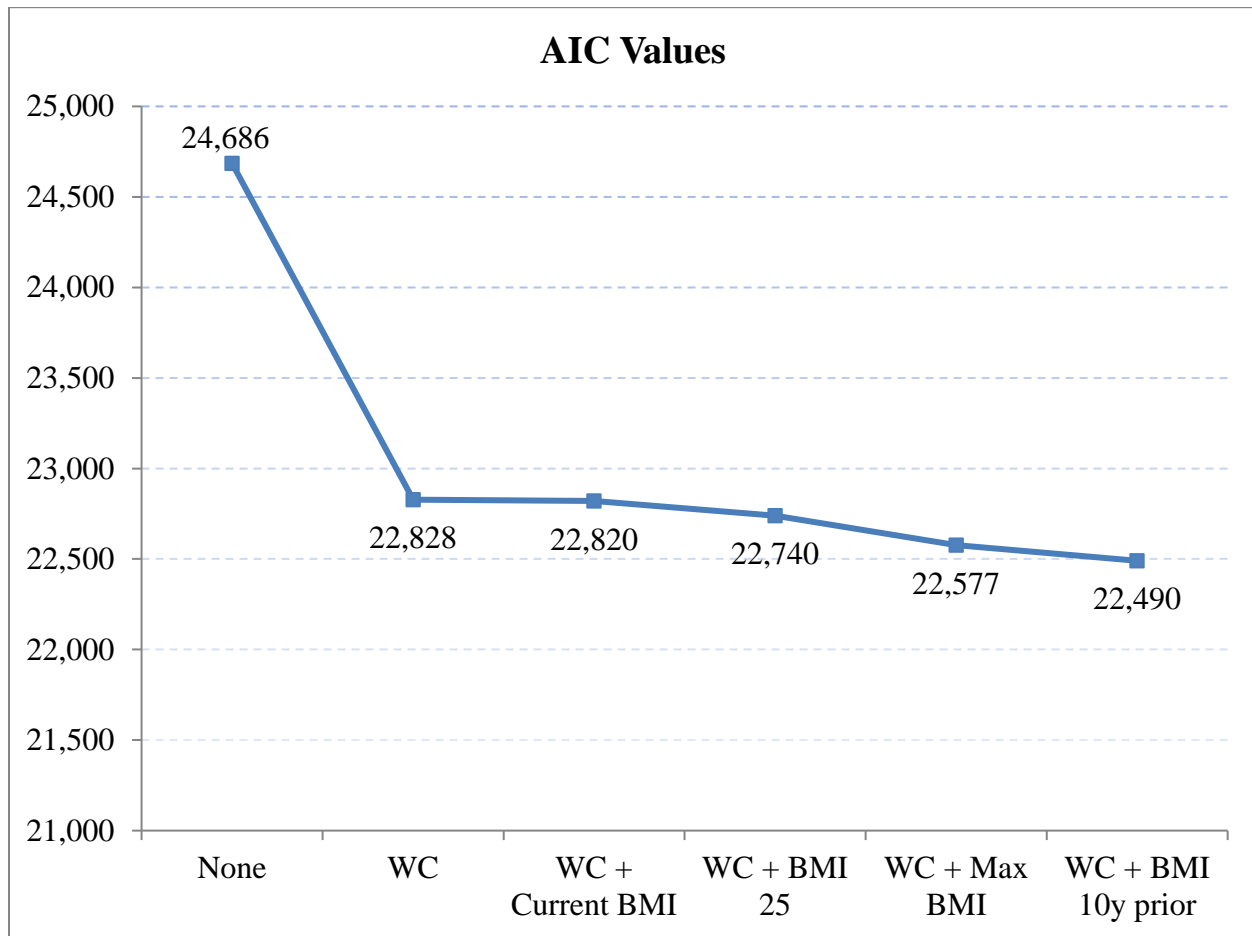

None: no adjustment for adiposity variables; WC: waist circumference; BMI: body mass index; max BMI: lifetime maximum BMI; BMI 10y prior: BMI 10 years prior to the survey. Lower values of AIC indicate a better performing model.

**Supplemental Table S1** Correlation matrix comparing adiposity measures

|            | Survey BMI | Max BMI | BMI_10 | BMI_25 | WC   |
|------------|------------|---------|--------|--------|------|
| Survey BMI | 1.00       |         |        |        |      |
| Max BMI    | 0.89       | 1.00    |        |        |      |
| BMI_10     | 0.70       | 0.80    | 1.00   |        |      |
| BMI_25     | 0.49       | 0.59    | 0.65   | 1.00   |      |
| WC         | 0.88       | 0.80    | 0.66   | 0.47   | 1.00 |

BMI: body mass index; WC: waist circumference; Max BMI: lifetime maximum BMI; BMI\_10: BMI 10 years prior to survey; BMI\_25: BMI at age 25. Correlation matrix restricted to subset of data with non-missing information on all the adiposity measures.

**Supplemental Table S2** Coefficients for Models 1 & 2

|                       | Model 1    |               | Model 2    |               |
|-----------------------|------------|---------------|------------|---------------|
|                       | Odds Ratio | 95% CI        | Odds Ratio | 95% CI        |
| Age                   | 1.049      | (1.045-1.054) | 1.048      | (1.043-1.053) |
| Sex                   |            |               |            |               |
| Women                 | 1.000      |               | 1.000      |               |
| Men                   | 1.327      | (1.212-1.452) | 1.073      | (0.970-1.187) |
| Race/ethnicity        |            |               |            |               |
| Non-Hispanic White    | 1.000      |               | 1.000      |               |
| Non-Hispanic Black    | 2.410      | (2.152-2.698) | 2.375      | (2.116-2.666) |
| Hispanic              | 1.901      | (1.661-2.175) | 2.201      | (1.909-2.538) |
| Other                 | 1.972      | (1.602-2.427) | 3.259      | (2.627-4.043) |
| Education Level       |            |               |            |               |
| Less than High School | 1.000      |               | 1.000      |               |
| High School           | 0.769      | (0.682-0.866) | 0.759      | (0.670-0.859) |
| More than High School | 0.574      | (0.511-0.646) | 0.613      | (0.543-0.693) |
| Survey Period         | 1.026      | (1.018-1.034) | 1.007      | (1.000-1.015) |
| Waist Circumference   |            |               | 1.040      | (1.036-1.046) |
| BMI 10 Years Prior    |            |               | 1.059      | (1.045-1.072) |
